# Supplementary material for: Rhinovirus increases Moraxella catarrhalis adhesion to the respiratory epithelium
Source: PubMed Central journal article supplement (PMC9886879; doi:10.3389/fcimb.2022.1060748), 2023-01-17
Supplement: DataSheet_1.pdf [file DataSheet_1.pdf]

(A)

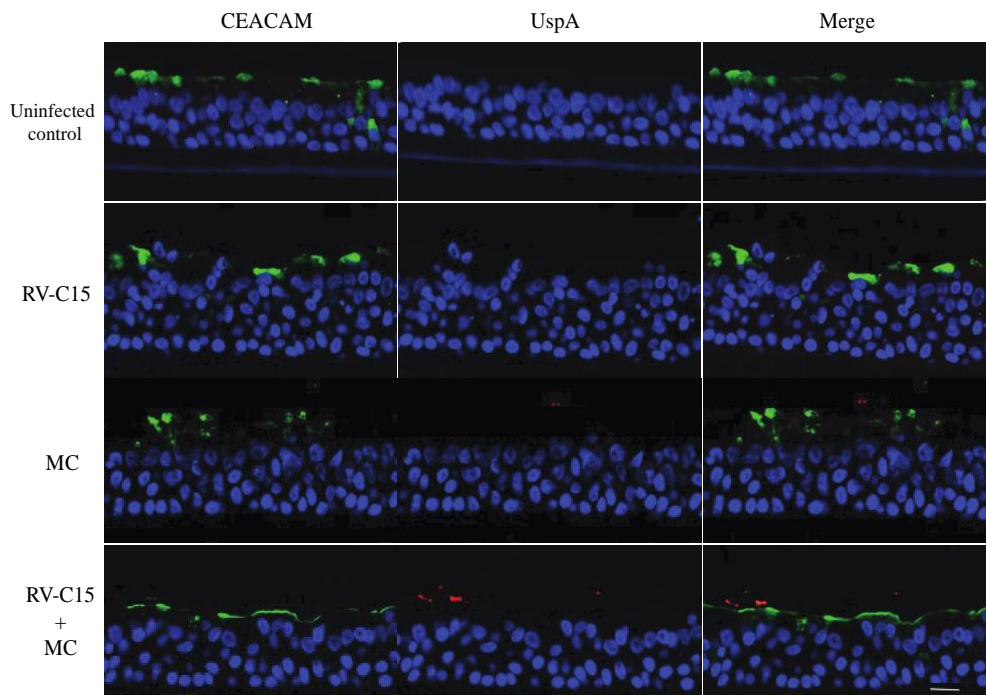

(B)

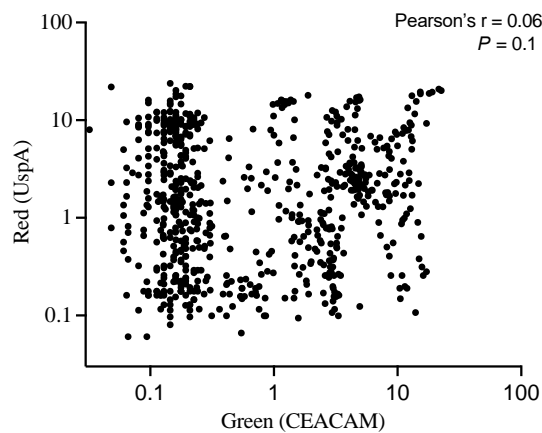

**Fig. S1:** (A) ALI cultures infected with RV-C15 for 2 hours, *M. catarrhalis* or both for 48 hours and were labeled with rabbit pan anti-CEACAM antibodies (green) and mouse anti-UspA (red) antibodies. DNA was stained with DAPI (blue). Representative histological sections were imaged using a 20× objective from at least 3 independent experiments. Scale bar = 20  $\mu$ m. (B) Representative scatterplot showing distribution of CEACAM and UspA signals in the RV-C15+MC infected epithelium from (A) ( $n = 5$ ; Pearson's correlation range = -0.09 to 0.14;  $P$  value range = 0.1 to 0.8).

(A)

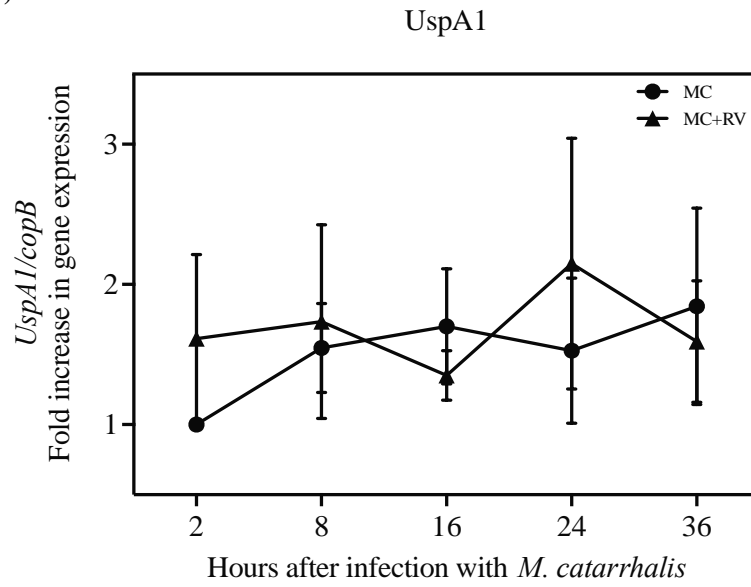

(B)

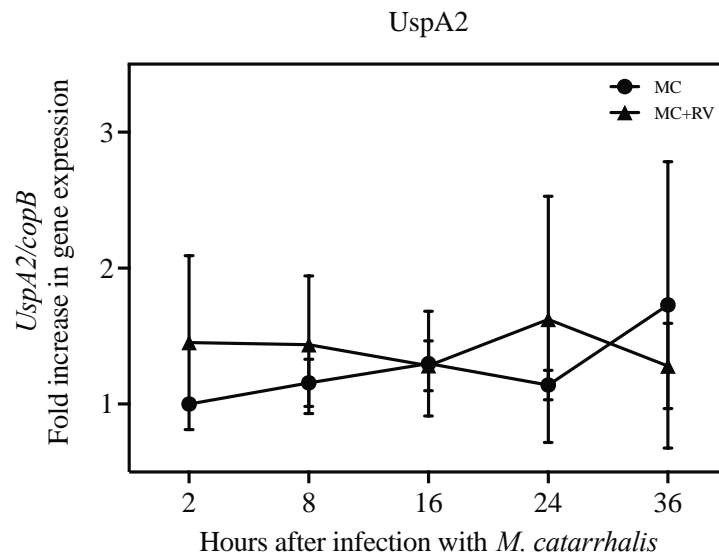

**Figure S2: UspA expression in infected ALI cultures**

Fully differentiated ALI cultures were infected with RV-C15 for 16 hours, followed by *M. catarrhalis* for 2 – 36 hours. The expression of (A) *UspA1* and (B) *UspA2* was measured by qPCR using specific primers given in table 1.
